# Supplementary material for: Perfectionism in a Transdiagnostic Context
Source: Atypon-hosted journal article supplement (doi:10.1027/1015-5759/a000541), 2019-11-26
Supplement: 1015-5759_a000541_esm1.pdf [file 1015-5759_a000541_esm1.pdf]

Doi: <https://doi.org/10.1027/1015-5759/a000541>

Supplemental material for

Perfectionism in a transdiagnostic context: an investigation of the criterion validity of the Almost Perfect Scale Revised

Table 1

Summary of hierarchical regression analyses for the High Standards Scale (APS-R 23) predicting self-reported scales

| Variable                                                | BDI-II        |           |         | BAI             |           |         | SPIN          |           |         | YBOCS            |           |         |               |           |         |                   |           |         |               |           |         |                   |      |       |
|---------------------------------------------------------|---------------|-----------|---------|-----------------|-----------|---------|---------------|-----------|---------|------------------|-----------|---------|---------------|-----------|---------|-------------------|-----------|---------|---------------|-----------|---------|-------------------|------|-------|
|                                                         | <i>B</i>      | <i>SE</i> | $\beta$ | <i>B</i>        | <i>SE</i> | $\beta$ | <i>B</i>      | <i>SE</i> | $\beta$ | <i>B</i>         | <i>SE</i> | $\beta$ | <i>B</i>      | <i>SE</i> | $\beta$ | <i>B</i>          | <i>SE</i> | $\beta$ | <i>B</i>      | <i>SE</i> | $\beta$ |                   |      |       |
| HS (APS-R 23)                                           | .027          | .093      | .014    | -               | .669      | -       | .075          | .101      | .036    | -                | .721      | -       | -             | .128      | -       | -                 | .910      | -       | -             | .061      | -       | -                 | .434 | -     |
| HS * HS                                                 |               |           |         | .039**          | .009      | 1.454   |               |           |         | .048**           | .010      | 1.652   |               |           |         | .043**            | .013      | 1.249   |               |           |         | .026**            | .006 | 1.489 |
| <i>R</i> <sup>2</sup> (Adjusted <i>R</i> <sup>2</sup> ) | .004 (.001)   |           |         | .040 (.035)     |           |         | .001 (<.001)  |           |         | .052 (.048)      |           |         | <.001 (<.001) |           |         | .030 (.025)       |           |         | .001 (<.001)  |           |         | .042 (.038)       |      |       |
| <i>F</i> for change in <i>R</i> <sup>2</sup>            | .084 (1, 447) |           |         | 18265**(1, 446) |           |         | .556 (1, 439) |           |         | 23.555**(1, 438) |           |         | .069 (1, 385) |           |         | 11.893** (1, 384) |           |         | .240 (1, 441) |           |         | 19.901** (1, 440) |      |       |

Note: All predictors were centered at their means. HS= APS-R 23 High Standards scale; BDI-II = Beck Depression Inventory-II, BAI = Beck Anxiety Inventory, SPIN = Social Phobia Inventory, YBOCS = Yale-Brown Obsessive Compulsive Scale

\* $p < .05$ . \*\* $p < .01$ .

Table 2

Summary of hierarchical regression analyses for the Discrepancy Scale (APS-R 23) predicting self-reported scales

| Variable                | BDI-II             |           |         | BAI            |           |         | SPIN               |           |         | YBOCS         |           |         |                    |           |         |               |      |      |                   |      |      |               |      |      |
|-------------------------|--------------------|-----------|---------|----------------|-----------|---------|--------------------|-----------|---------|---------------|-----------|---------|--------------------|-----------|---------|---------------|------|------|-------------------|------|------|---------------|------|------|
|                         | <i>B</i>           | <i>SE</i> | $\beta$ | <i>B</i>       | <i>SE</i> | $\beta$ | <i>B</i>           | <i>SE</i> | $\beta$ | <i>B</i>      | <i>SE</i> | $\beta$ | <i>B</i>           | <i>SE</i> | $\beta$ |               |      |      |                   |      |      |               |      |      |
|                         | <i>B</i>           |           |         | <i>B</i>       |           |         | <i>B</i>           |           |         | <i>B</i>      |           |         |                    |           |         |               |      |      |                   |      |      |               |      |      |
| DI (APS-R 23)           | .439**             | .027      | .612    | .170           | .156      | .236    | .356**             | .033      | .457    | .340          | .192      | .437    | .548               | .038      | .595    | .664          | .221 | .720 | .177**            | .020 | .380 | .275          | .119 | .592 |
| DI*DI (APS-R 23)        |                    |           |         | .003           | .002      | .381    |                    |           |         | <.001         | .002      | .021    |                    |           |         | -             | .002 | -    |                   |      |      | -             | .001 | -    |
| $R^2$ (Adjusted $R^2$ ) | .374 (.373)        |           |         | .378 (.376)    |           |         | .209 (.207)        |           |         | .207 (.205)   |           |         | .354 (.352)        |           |         | .354 (.351)   |      |      | .144 (.142)       |      |      | .146 (.142)   |      |      |
| $F$ for change in $R^2$ | 267.172** (1, 447) |           |         | 3.066 (1, 446) |           |         | 116.024** (1, 439) |           |         | .007 (1, 438) |           |         | 210.700** (1, 385) |           |         | .282 (1, 384) |      |      | 74.407** (1, 441) |      |      | .704 (1, 440) |      |      |

Note: All predictors were centered at their means. DI = APS-R 23 Discrepancy scale; BDI-II = Beck Depression Inventory-II, BAI = Beck Anxiety Inventory, SPIN = Social Phobia Inventory, YBOCS = Yale-Brown Obsessive Compulsive Scale

\* $p < .05$ . \*\* $p < .01$ .

Table 3.

Summary of hierarchical regression analyses for the APS-R 23 scales predicting self-reported scales

| <i>Clinical index</i>                         |               |             |         |                 |              |         | <i>Clinical index</i>                         |                 |             |         |               |              |         |
|-----------------------------------------------|---------------|-------------|---------|-----------------|--------------|---------|-----------------------------------------------|-----------------|-------------|---------|---------------|--------------|---------|
| <i>Variable</i>                               | <i>B</i>      | <i>SE B</i> | $\beta$ | <i>B</i>        | <i>SE(B)</i> | $\beta$ | <i>Variable</i>                               | <i>B</i>        | <i>SE B</i> | $\beta$ | <i>B</i>      | <i>SE(B)</i> | $\beta$ |
| <i>HS (APS-R 23)</i>                          | .001          | .014        | .005    | -.227*          | .093         | -1.383  | <i>DS (APS-R 23)</i>                          | .022**          | .006        | .291    | -.026         | .042         | -.338   |
| <i>HS * HS (APS-R 23)</i>                     |               |             |         | .003*           | .001         | 1.402   | <i>DS * DS (APS-R 23)</i>                     |                 |             |         | <.001         | <.001        | .636    |
| <i>R<sup>2</sup> (Adjusted R<sup>2</sup>)</i> | <.001 (<.001) |             |         | .040 (.027)     |              |         | <i>R<sup>2</sup> (Adjusted R<sup>2</sup>)</i> | .085 (.078)     |             |         | .093 (.080)   |              |         |
| <i>F for change in R<sup>2</sup></i>          | .003 (1,145)  |             |         | 6.083** (1,145) |              |         | <i>F for change in R<sup>2</sup></i>          | 13.492**(1,146) |             |         | 1.343 (1,146) |              |         |

*Note:* All predictors were centered at their means. DI = APS-R 23 Discrepancy scale; HS= APS-R 23 High Standards scale  
 \* $p < .05$ . \*\* $p < .01$ .

Table 4

Summary of hierarchical regression analyses for the High Standards Scale (APS-R 8, factorial score) predicting self-reported scales

| Variable                                                | BDI-II         |           |         | BAI              |              |         | SPIN          |           |         | YBOCS            |           |         |               |              |         |                   |       |      |               |      |      |                   |       |      |
|---------------------------------------------------------|----------------|-----------|---------|------------------|--------------|---------|---------------|-----------|---------|------------------|-----------|---------|---------------|--------------|---------|-------------------|-------|------|---------------|------|------|-------------------|-------|------|
|                                                         | <i>B</i>       | <i>SE</i> | $\beta$ | <i>B</i>         | <i>SE(B)</i> | $\beta$ | <i>B</i>      | <i>SE</i> | $\beta$ | <i>B</i>         | <i>SE</i> | $\beta$ | <i>B</i>      | <i>SE(B)</i> | $\beta$ |                   |       |      |               |      |      |                   |       |      |
|                                                         | <i>B</i>       |           |         | <i>B</i>         |              |         | <i>B</i>      |           |         | <i>B</i>         |           |         |               |              |         |                   |       |      |               |      |      |                   |       |      |
| HS (APS-R 8)                                            | .758           | .600      | .060    | -                | 2.716        | -       | .561          | .652      | .041    | -                | 2.934     | -       | .765          | .819         | .048    | -                 | 3.647 | -    | .070          | .392 | .008 | -                 | 1.771 | -    |
| HS * HS (APS-R 8)                                       |                |           |         | 11.410**         |              | .897    |               |           |         | 13.772**         |           | 1.007   |               |              |         | 13.287**          |       | .826 |               |      |      | 7.344**           |       | .893 |
|                                                         |                |           |         | 12.472**         | 2.718        | .980    |               |           |         | 14.687**         | 2.935     | 1.073   |               |              |         | 14.618**          | 3.701 | .896 |               |      |      | 7.603**           | 1.773 | .924 |
| <i>R</i> <sup>2</sup> (Adjusted <i>R</i> <sup>2</sup> ) | .060 (.001)    |           |         | .048 (.044)      |              |         | .002 (-.001)  |           |         | .056 (.051)      |           |         | .002 (<.001)  |              |         | .041 (.036)       |       |      | <.001 (-.002) |      |      | .042 (.036)       |       |      |
| <i>F</i> for change in <i>R</i> <sup>2</sup>            | 1.596 (1, 447) |           |         | 21.051**(1, 446) |              |         | .740 (1, 439) |           |         | 25.041**(1, 438) |           |         | .873 (1, 385) |              |         | 15.601** (1, 384) |       |      | .032 (1, 441) |      |      | 18.395** (1, 440) |       |      |

Note: All predictors were centered at their means. HS= APS-R 8 High Standards scale; BDI-II = Beck Depression Inventory-II, BAI = Beck Anxiety Inventory, SPIN =

Social Phobia Inventory, YBOCS = Yale-Brown Obsessive Compulsive Scale

\**p* < .05. \*\**p* < .01.

Table 5

Summary of hierarchical regression analyses for the Discrepancy Scale (APS-R 8, factorial scores) predicting self-reported scales

| Variable                | BDI-II            |     |         |                |       |         | BAI                |     |         |               |       |         | SPIN               |     |         |                |       |         | YBOCS             |     |         |               |       |         |
|-------------------------|-------------------|-----|---------|----------------|-------|---------|--------------------|-----|---------|---------------|-------|---------|--------------------|-----|---------|----------------|-------|---------|-------------------|-----|---------|---------------|-------|---------|
|                         | B                 | SE  | $\beta$ | B              | SE(B) | $\beta$ | B                  | SE  | $\beta$ | B             | SE(B) | $\beta$ | B                  | SE  | $\beta$ | B              | SE(B) | $\beta$ | B                 | SE  | $\beta$ | B             | SE(B) | $\beta$ |
| DI (APS-R 8)            | 7.309*            | .49 | .57     | 3.78           | **    | .29     | 5.947*             | .59 | .43     | 7.501*        | 2.562 | .54     | 9.168*             | .69 | .55     | 12.671*        | 2.982 | .77     | 2.853*            | .36 | .34     | 3.659         | 1.585 | .44     |
| DI*DI (APS-R 8)         |                   |     |         | 3.62           | 2.12  | .28     |                    |     |         | -1.595        | 2.558 | -       |                    |     |         | -3.610         | 2.989 | -       |                   |     |         | -0.829        | 1.585 | -       |
| $R^2$ (Adjusted $R^2$ ) | .330 (.329)       |     |         | .335 (.332)    |       |         | .186 (.185)        |     |         | .187 (.183)   |       |         | .313 (.311)        |     |         | .315 (.312)    |       |         | .120 (.118)       |     |         | .121 (.117)   |       |         |
| F for change in $R^2$   | 220.329** (1,447) |     |         | 2.908 (1, 446) |       |         | 100.614** (1, 439) |     |         | .389 (1, 438) |       |         | 175.139** (1, 385) |     |         | 1.458 (1, 384) |       |         | 60.133** (1, 441) |     |         | .273 (1, 440) |       |         |

Note: All predictors were centered at their means. DI = APS-R 23 Discrepancy scale; BDI-II = Beck Depression Inventory-II, BAI = Beck Anxiety Inventory, SPIN = Social Phobia Inventory, YBOCS = Yale-Brown Obsessive Compulsive Scale

\* $p < .05$ . \*\* $p < .01$ .

Table 6.

Summary of hierarchical regression analyses for the APS-R 8 scales (factorial scores) predicting self-reported scales

| <i>Clinical index</i>                        |               |             |         |                 |              |         | <i>Clinical index</i>                        |                   |             |         |               |              |         |
|----------------------------------------------|---------------|-------------|---------|-----------------|--------------|---------|----------------------------------------------|-------------------|-------------|---------|---------------|--------------|---------|
| <i>Variable</i>                              | <i>B</i>      | <i>SE B</i> | $\beta$ | <i>B</i>        | <i>SE(B)</i> | $\beta$ | <i>Variable</i>                              | <i>B</i>          | <i>SE B</i> | $\beta$ | <i>B</i>      | <i>SE(B)</i> | $\beta$ |
| <i>HS (APS-R 8)</i>                          | -.017         | .085        | -.016   | -.856*          | .350         | -.834   | <i>DS (APS-R 8)</i>                          | .336**            | .103        | .261    | .032          | .468         | .025    |
| <i>HS * HS (APS-R 8)</i>                     |               |             |         | .897*           | .364         | .842    | <i>DS * DS (APS-R 8)</i>                     |                   |             |         | .283          | .426         | .242    |
| <i>R<sup>2</sup>(Adjusted R<sup>2</sup>)</i> | <.001 (-.007) |             |         | .041 (.027)     |              |         | <i>R<sup>2</sup>(Adjusted R<sup>2</sup>)</i> | .068 (.062)       |             |         | .071 (.058)   |              |         |
| <i>F for change in R<sup>2</sup></i>         | .038 (1, 146) |             |         | 6.088* (1, 145) |              |         | <i>F for change in R<sup>2</sup></i>         | 10.636** (1, 146) |             |         | .443 (1, 145) |              |         |

*Note:* All predictors were centered at their means. DI = APS-R 8 Discrepancy factorial score; HS= APS-R 8 High Standards factorial score  
 \* $p < .05$ . \*\* $p < .01$ .
