# Supplementary material for: Perfectionism in a Transdiagnostic Context
Source: Atypon-hosted journal article supplement (doi:10.1027/1015-5759/a000541), 2019-11-26
Supplement: 1015-5759_a000541_esm2.pdf [file 1015-5759_a000541_esm2.pdf]

Doi: <https://doi.org/10.1027/1015-5759/a000541>

|                       | chi    | df | AIC     | BIC     | CFI  | TLI |
|-----------------------|--------|----|---------|---------|------|-----|
| Configural invariance | 99.31  | 19 | 11732.4 | 11802.3 | 0.95 | .94 |
| Loadings invariance   | 138.64 | 25 | 11759.8 | 11804.2 | 0.93 | .93 |

```
> configural.model <-'  
+ stand =~ apsr8 + apsr12 + apsr14 + apsr22  
+ discrep =~ apsr11 + apsr16 + apsr20 + apsr23  
+  
+ stand ~~ discrep  
+ '  
>  
> fit <- cfa(configural.model, data=aps_r)  
> summary(fit, fit.measures=TRUE, standardized = TRUE)
```

lavaan (0.5-23.1097) converged normally after 29 iterations

|                                 |        |
|---------------------------------|--------|
| Number of observations          | 449    |
| Estimator                       | ML     |
| Minimum Function Test Statistic | 99.313 |
| Degrees of freedom              | 19     |
| P-value (Chi-square)            | 0.000  |

Model test baseline model:

|                                 |          |
|---------------------------------|----------|
| Minimum Function Test Statistic | 1760.533 |
| Degrees of freedom              | 28       |
| P-value                         | 0.000    |

User model versus baseline model:

|                             |       |
|-----------------------------|-------|
| Comparative Fit Index (CFI) | 0.954 |
| Tucker-Lewis Index (TLI)    | 0.932 |

Loglikelihood and Information Criteria:

|                                       |           |
|---------------------------------------|-----------|
| Loglikelihood user model (H0)         | -5849.219 |
| Loglikelihood unrestricted model (H1) | -5799.563 |
| Number of free parameters             | 17        |
| Akaike (AIC)                          | 11732.439 |
| Bayesian (BIC)                        | 11802.258 |
| Sample-size adjusted Bayesian (BIC)   | 11748.307 |

Root Mean Square Error of Approximation:

|                                |             |
|--------------------------------|-------------|
| RMSEA                          | 0.097       |
| 90 Percent Confidence Interval | 0.079 0.116 |
| P-value RMSEA <= 0.05          | 0.000       |

Standardized Root Mean Square Residual:

|      |       |
|------|-------|
| SRMR | 0.066 |
|------|-------|

Parameter Estimates:

|                 |          |
|-----------------|----------|
| Information     | Expected |
| Standard Errors | Standard |

Latent Variables:

|            | Estimate | Std.Err | z-value | P(> z ) | std.lv | std.all |
|------------|----------|---------|---------|---------|--------|---------|
| stand =~   |          |         |         |         |        |         |
| apsr8      | 1.000    |         |         |         | 0.948  | 0.818   |
| apsr12     | 1.185    | 0.076   | 15.663  | 0.000   | 1.124  | 0.766   |
| apsr14     | 0.838    | 0.058   | 14.575  | 0.000   | 0.795  | 0.708   |
| apsr22     | 1.138    | 0.085   | 13.425  | 0.000   | 1.078  | 0.655   |
| discrep =~ |          |         |         |         |        |         |
| apsr11     | 1.000    |         |         |         | 1.446  | 0.807   |
| apsr16     | 0.955    | 0.053   | 18.029  | 0.000   | 1.380  | 0.788   |
| apsr20     | 1.133    | 0.056   | 20.208  | 0.000   | 1.637  | 0.872   |
| apsr23     | 1.001    | 0.055   | 18.037  | 0.000   | 1.446  | 0.788   |

Covariances:

|          | Estimate | Std.Err | z-value | P(> z ) | Std.lv | Std.all |
|----------|----------|---------|---------|---------|--------|---------|
| stand ~~ |          |         |         |         |        |         |
| discrep  | 0.463    | 0.081   | 5.728   | 0.000   | 0.338  | 0.338   |

Variances:

|         | Estimate | Std.Err | z-value | P(> z ) | Std.lv | Std.all |
|---------|----------|---------|---------|---------|--------|---------|
| .apsr8  | 0.443    | 0.050   | 8.927   | 0.000   | 0.443  | 0.330   |
| .apsr12 | 0.888    | 0.083   | 10.671  | 0.000   | 0.888  | 0.413   |
| .apsr14 | 0.627    | 0.052   | 12.002  | 0.000   | 0.627  | 0.498   |
| .apsr22 | 1.552    | 0.121   | 12.793  | 0.000   | 1.552  | 0.572   |
| .apsr11 | 1.122    | 0.098   | 11.468  | 0.000   | 1.122  | 0.349   |
| .apsr16 | 1.164    | 0.098   | 11.918  | 0.000   | 1.164  | 0.379   |
| .apsr20 | 0.848    | 0.094   | 9.045   | 0.000   | 0.848  | 0.240   |
| .apsr23 | 1.276    | 0.107   | 11.912  | 0.000   | 1.276  | 0.379   |
| stand   | 0.899    | 0.093   | 9.614   | 0.000   | 1.000  | 1.000   |
| discrep | 2.090    | 0.210   | 9.929   | 0.000   | 1.000  | 1.000   |

```
> loadings.model <-'
+
+ stand =~ 1*apsr8 + 1.26*apsr12 + 0.96*apsr14 + 1*apsr22
+ discrep =~ 1*apsr11 + 0.97*apsr16 + 0.95*apsr20 + 0.80*apsr23
+
+ stand ~~ discrep
+
>
> fit <- cfa(loadings.model, data=aps_r)
> summary(fit, fit.measures=TRUE, standardized = TRUE)
```

lavaan (0.5-23.1097) converged normally after 25 iterations

|                                 |         |
|---------------------------------|---------|
| Number of observations          | 449     |
| Estimator                       | ML      |
| Minimum Function Test Statistic | 138.644 |
| Degrees of freedom              | 25      |
| P-value (Chi-square)            | 0.000   |

Model test baseline model:

|                                 |          |
|---------------------------------|----------|
| Minimum Function Test Statistic | 1760.533 |
| Degrees of freedom              | 28       |
| P-value                         | 0.000    |

User model versus baseline model:

|                             |       |
|-----------------------------|-------|
| Comparative Fit Index (CFI) | 0.934 |
| Tucker-Lewis Index (TLI)    | 0.927 |

Loglikelihood and Information Criteria:

Loglikelihood user model (H0) -5868.885  
 Loglikelihood unrestricted model (H1) -5799.563  
 Number of free parameters 11  
 Akaike (AIC) 11759.770  
 Bayesian (BIC) 11804.947  
 Sample-size adjusted Bayesian (BIC) 11770.038

Root Mean Square Error of Approximation:

RMSEA 0.101  
 90 Percent Confidence Interval 0.085 0.117  
 P-value RMSEA <= 0.05 0.000

Standardized Root Mean Square Residual:

SRMR 0.094

Parameter Estimates:

Information Standard Errors Expected Standard

Latent Variables:

|            | Estimate | Std.Err | z-value | P(> z ) | std.lv | std.all |
|------------|----------|---------|---------|---------|--------|---------|
| stand =~   |          |         |         |         |        |         |
| apsr8      | 1.000    |         |         |         | 0.915  | 0.805   |
| apsr12     | 1.260    |         |         |         | 1.153  | 0.775   |
| apsr14     | 0.960    |         |         |         | 0.878  | 0.750   |
| apsr22     | 1.000    |         |         |         | 0.915  | 0.581   |
| discrep =~ |          |         |         |         |        |         |
| apsr11     | 1.000    |         |         |         | 1.569  | 0.839   |
| apsr16     | 0.970    |         |         |         | 1.522  | 0.825   |
| apsr20     | 0.950    |         |         |         | 1.490  | 0.831   |
| apsr23     | 0.800    |         |         |         | 1.255  | 0.726   |

Covariances:

|                  | Estimate | Std.Err | z-value | P(> z ) | std.lv | std.all |
|------------------|----------|---------|---------|---------|--------|---------|
| stand ~~ discrep | 0.480    | 0.082   | 5.865   | 0.000   | 0.334  | 0.334   |

Variances:

|         | Estimate | Std.Err | z-value | P(> z ) | std.lv | std.all |
|---------|----------|---------|---------|---------|--------|---------|
| .apsr8  | 0.455    | 0.044   | 10.392  | 0.000   | 0.455  | 0.352   |
| .apsr12 | 0.881    | 0.079   | 11.224  | 0.000   | 0.881  | 0.399   |
| .apsr14 | 0.601    | 0.051   | 11.798  | 0.000   | 0.601  | 0.438   |
| .apsr22 | 1.640    | 0.119   | 13.744  | 0.000   | 1.640  | 0.662   |
| .apsr11 | 1.037    | 0.095   | 10.858  | 0.000   | 1.037  | 0.296   |
| .apsr16 | 1.088    | 0.096   | 11.288  | 0.000   | 1.088  | 0.320   |
| .apsr20 | 0.994    | 0.090   | 11.100  | 0.000   | 0.994  | 0.309   |
| .apsr23 | 1.413    | 0.108   | 13.080  | 0.000   | 1.413  | 0.473   |
| stand   | 0.837    | 0.067   | 12.473  | 0.000   | 1.000  | 1.000   |
| discrep | 2.461    | 0.186   | 13.259  | 0.000   | 1.000  | 1.000   |
| 0.805   |          |         |         |         |        |         |
| 0.775   |          |         |         |         |        |         |
| 0.750   |          |         |         |         |        |         |
| 0.581   |          |         |         |         |        |         |
| 0.762   |          |         |         |         |        |         |
| 0.851   |          |         |         |         |        |         |
| 0.831   |          |         |         |         |        |         |
| 0.735   |          |         |         |         |        |         |

Covariances:

|                  | Estimate | Std.Err | z-value | P(> z ) | std.lv |
|------------------|----------|---------|---------|---------|--------|
| stand ~~ discrep | 0.507    | 0.084   | 6.012   | 0.000   | 0.344  |
| std.all          |          |         |         |         |        |

0.344

Variances:

|         | Estimate | Std.Err | z-value | P(> z ) | Std.lv |
|---------|----------|---------|---------|---------|--------|
| .apsr8  | 0.455    | 0.044   | 10.398  | 0.000   | 0.455  |
| .apsr12 | 0.881    | 0.078   | 11.228  | 0.000   | 0.881  |
| .apsr14 | 0.601    | 0.051   | 11.802  | 0.000   | 0.601  |
| .apsr22 | 1.639    | 0.119   | 13.745  | 0.000   | 1.639  |
| .apsr20 | 1.198    | 0.096   | 12.485  | 0.000   | 1.198  |
| .apsr11 | 0.986    | 0.097   | 10.179  | 0.000   | 0.986  |
| .apsr16 | 1.087    | 0.100   | 10.872  | 0.000   | 1.087  |
| .apsr23 | 1.411    | 0.110   | 12.871  | 0.000   | 1.411  |
| stand   | 0.837    | 0.067   | 12.473  | 0.000   | 1.000  |
| discrep | 2.585    | 0.196   | 13.164  | 0.000   | 1.000  |
| std.all |          |         |         |         |        |
| 0.352   |          |         |         |         |        |
| 0.399   |          |         |         |         |        |
| 0.438   |          |         |         |         |        |
| 0.662   |          |         |         |         |        |
| 0.420   |          |         |         |         |        |
| 0.276   |          |         |         |         |        |
| 0.309   |          |         |         |         |        |
| 0.460   |          |         |         |         |        |
| 1.000   |          |         |         |         |        |
| 1.000   |          |         |         |         |        |
